# Supplementary material for: Zinc phosphate-based nanoparticles as a novel antibacterial agent: in vivo study on rats after dietary exposure
Source: J Anim Sci Biotechnol. 2019 Feb 12;10:17. doi: 10.1186/s40104-019-0319-8 (PMC6373129; doi:10.1186/s40104-019-0319-8)
Supplement: Supplementary file 1 — Figure S1. TEM image of commercial ZnO-N. Figure S2. Histological analysis of liver (1) and duodenum (2) of the groups rats ZnA (A, B); ZnB (C, D); ZnC (E, F); ZnD (G, H); ZnO-N (I, J); ZnO (K, L) and control group (M, N). Table S1. The weight of rats, g. (DOCX 2889 kb) [file 40104_2019_319_MOESM1_ESM.docx]

**Additional file**

**Zinc phosphate-based nanoparticles as a novel antibacterial agent: *In vivo* study on rats after dietary exposure**

Pavel Horkya, Sylvie Skalickovaa, Lenka Urbankovaa,Daria Baholeta, Silvia Kociovab, Zuzana Bytesnikovab, Eliska Kabourkovab, Zuzana Lackovab,c, Natalia Cerneib,c, Milica Gagicb, Vedran Milosavljevicb,c, Vendula Smolikovab,c, Eva Vaclavkovad, Pavel Nevrklae, Pavel Knota, Olga Krystofovab,c, David Hynekb,c, Pavel Kopelb,c, Jiri Skladankaa, Vojtech Adamb,c, Kristyna Smerkovab,c***

*aDepartment of Animal Nutrition and Forage Production, Mendel University in Brno, Zemedelska 1, CZ-613 00 Brno, Czech Republic; pavel.horky@mendelu.cz, sylvie.skalickova@gmail.com, lenka.urbankova@mendelu.cz, xbaholet@mendelu.cz,* *pavel.knot@mendelu.cz, jiri.skladanka@mendelu.cz*

*bDepartment of Chemistry and Biochemistry, Mendel University in Brno, Zemedelska 1, CZ-613 00 Brno, Czech Republic; skociova@gmail.com, zuzka.bytesnikova@gmail.com, eliska.kabourkova404@gmail.com, Lackova14@seznam.cz, cernei.natalia3@gmail.com, gagic.milica@gmail.com, grizlidripac@gmail.com, VendulaSmolikova@seznam.cz, olga.krystofova@seznam.cz, d.hynek@email.cz, paulko@centrum.cz,* *vojtech.adam@mendelu.cz, kristyna.smerkova@mendelu.cz*

*cCentral European Institute of Technology, Brno University of Technology, Purkynova 123, CZ-612 00 Brno, Czech Republic*

*dInstitute of Animal Science, Komenskeho 1239, CZ-517 41 Kostelec nad Orlici, Czech Republic; vaclavkova.eva@vuzv.cz*

*eDepartment of Animal Breeding, Mendel University in Brno, Zemedelska 1, CZ-613 00 Brno, Czech Republic; nevrkla.uchhz@mendelu.cz*

*Corresponding author: Kristyna Smerkova, Department of Chemistry and Biochemistry, Mendel University in Brno, Zemedelska 1, CZ-613 00 Brno, Czech Republic, E-mail: kristyna.smerkova@mendelu.cz; Phone: +420 545 133 290

**Figure S1** TEM image of commercial ZnO-N


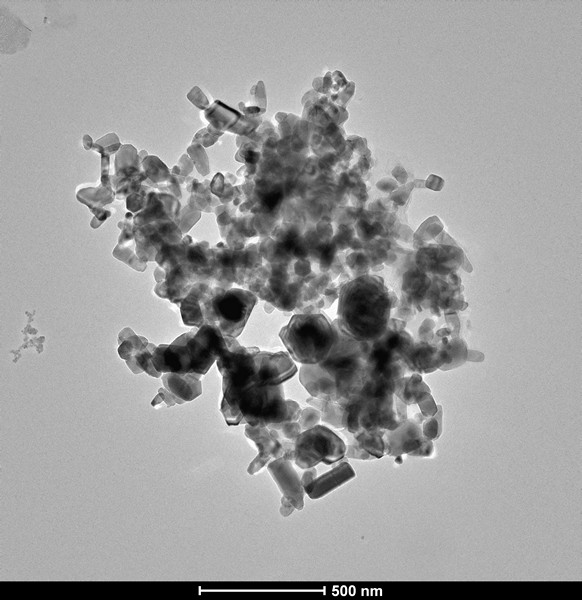


**Figure S2** Histological analysis of liver (1) and duodenum (2) of the groups rats ZnA (A, B); ZnB (C, D); ZnC (E, F); ZnD (G, H); ZnO-N (I, J); ZnO (K, L) and control group (M, N).


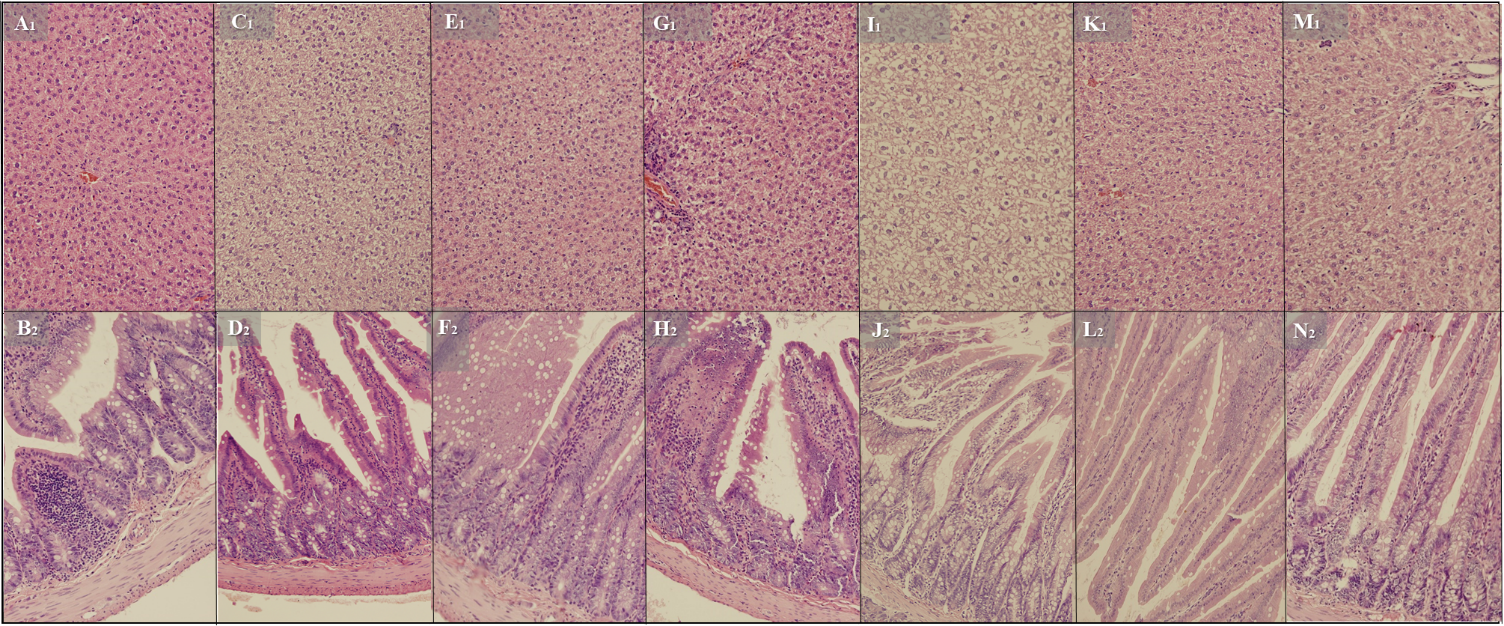


**Table S1** The weight of rats, g

| *Days of experiment* | | | | | |
| --- | --- | --- | --- | --- | --- |
|  | 0 | 7 | 14 | 21 | 28 |
| ZnA | 138.2±6.8 | 149.4±5.3 | 165.6±5.3 | 190.8±6.2 | 193.8±6.2 |
| ZnB | 137.0±4.5 | 162.8±7.2 | 194.4±8.6 | 208.0±6.6 | 218.2±6.4 |
| ZnC | 144.0±4.8 | 156.2±4.2 | 187.4±5.3 | 194.6±6.5 | 200.4±8.8 |
| ZnD | 130.4±5.7 | 157.2±6.1 | 185.4±9.9 | 201.0±9.9 | 200.6±8.5 |
| ZnO-N | 155.2±5.7 | 159.6±4.7 | 178.2±8.2 | 190.2±3.5 | 198.8±3.7 |
| ZnO  Control | 153.2±8.5  144.0±4.8 | 164.2±7.4  149.6±4.0 | 185.0±7.4  172.6±2.5 | 190.8±7.3  182.0±4.5 | 202.8±5.4  199.6±5.3 |
